# Supplementary material for: A turn-on fluorescent sensor for relay recognition of two ions: from a F−-selective sensor to highly Zn2+-selective sensor by tuning electronic effects
Source: Royal Society of Chemistry journal article supplement (doi:10.1039/c6ra05381e), 2016-01-01
Supplement: c6ra05381e1.pdf [file c6ra05381e1.pdf]

*Electronic Supplementary Material*

**A turn-on fluorescent sensor for relay recognition of two  
ions: From F<sup>-</sup>-selective sensor to highly Zn<sup>2+</sup>-selective  
sensor by tuning electronic effects**

Wen-Juan Qu, Jie Guan, Tai-Bao Wei, Guo-Tao Yan, Qi Lin, and You-Ming Zhang\*

-----  
E-mail: zhangnwnu@126.com<sup>†</sup>  
-----

*Key Laboratory of Eco-Environment-Related Polymer Materials, Ministry of  
Education of China; Key Laboratory of Polymer Materials of Gansu Province;  
College of Chemistry and Chemical Engineering, Northwest Normal University,  
Lanzhou, Gansu, 730070. P. R. China*

---

\*Corresponding author  
Tel: +086 9317973191; E-mail address: zhangnwnu@126.com

## Contents

|                                                                                                                       |    |
|-----------------------------------------------------------------------------------------------------------------------|----|
| 1. General Methods .....                                                                                              | 3  |
| 2. Synthesis of sensor molecule L2 .....                                                                              | 4  |
| 3. Absorbance spectra of L2 in DMSO in the presence of fluoride anions .....                                          | 5  |
| 4. Plot of fluorescence intensity depending on the concentration of zinc ions .....                                   | 6  |
| 5. Determination of Detection Limit .....                                                                             | 7  |
| 6. The UV-vis spectroscopy and fluorescence spectroscopy for the stability and reproducibility of the sensor L2 ..... | 8  |
| 7. IR spectra of sensor L2 and after adding fluoride anions .....                                                     | 9  |
| 8. IR spectra of L2-F and after adding zinc ions .....                                                                | 10 |
| 9. The Job's plot examined between zinc ions and L2-F .....                                                           | 11 |
| 10. ESI/MS of L2 .....                                                                                                | 12 |
| 11. ESI/MS of L2-F with zinc .....                                                                                    | 13 |
| 12. <sup>1</sup> H-NMR spectrum of L2 .....                                                                           | 14 |
| 13. <sup>13</sup> C-NMR spectrum of L2 .....                                                                          | 15 |

## 1. General Methods

Fresh double distilled water was used throughout the experiment. All other reagents and solvents were commercially available at analytical grade and were used without further purification.  $^1\text{H}$ -NMR and  $^{13}\text{C}$ -NMR spectra were recorded on an Agilent DD2 at 600 MHz spectra.  $^1\text{H}$  chemical shifts are reported in ppm downfield from tetramethylsilane (TMS,  $\delta$  scale) with the solvent resonances as internal standards. UV-visible spectra were recorded on a Shimadzu UV-2550 spectrometer. Photoluminescence spectra were performed on a Shimadzu RF-5301 fluorescence spectrophotometer. Melting points were measured on an X-4 digital melting-point apparatus. The infrared spectra were performed on a Digilab FTS-3000 FT-IR spectrophotometer.

All the UV-vis experiments were carried out in DMSO on a Shimadzu UV-2550 spectrometer. Any changes in the UV-vis spectra of the synthesized compound were recorded on addition of perchlorate salts while keeping the ligand concentration constant ( $2.0 \times 10^{-5}$  M) in all experiments. perchlorate salt ( $4.0 \times 10^{-4}$  M) of anions ( $\text{Fe}^{3+}$ ,  $\text{Hg}^{2+}$ ,  $\text{Ag}^+$ ,  $\text{Ca}^{2+}$ ,  $\text{Cu}^{2+}$ ,  $\text{Co}^{2+}$ ,  $\text{Ni}^{2+}$ ,  $\text{Cd}^{2+}$ ,  $\text{Pb}^{2+}$ ,  $\text{Zn}^{2+}$ ,  $\text{Cr}^{3+}$ , and  $\text{Mg}^{2+}$ ) and Tetrabutylammonium salt ( $1.0 \times 10^{-3}$  M) of anions ( $\text{F}^-$ ,  $\text{Cl}^-$ ,  $\text{Br}^-$ ,  $\text{I}^-$ ,  $\text{AcO}^-$ ,  $\text{H}_2\text{PO}_4^-$ ,  $\text{HSO}_4^-$  and  $\text{ClO}_4^-$ ) and sodium salt ( $1.0 \times 10^{-3}$  M) of anions ( $\text{CN}^-$ ) were used for the UV-vis experiments.

All the fluorescence spectroscopy was carried out in DMSO on a Shimadzu RF-5301 spectrometer. Any changes in the fluorescence spectra of the synthesized compound were recorded on addition of perchlorate salts while keeping the ligand concentration constant ( $2.0 \times 10^{-5}$  M) in all experiments. perchlorate salt ( $4.0 \times 10^{-4}$  M) of anions ( $\text{Fe}^{3+}$ ,  $\text{Hg}^{2+}$ ,  $\text{Ag}^+$ ,  $\text{Ca}^{2+}$ ,  $\text{Cu}^{2+}$ ,  $\text{Co}^{2+}$ ,  $\text{Ni}^{2+}$ ,  $\text{Cd}^{2+}$ ,  $\text{Pb}^{2+}$ ,  $\text{Zn}^{2+}$ ,  $\text{Cr}^{3+}$ , and  $\text{Mg}^{2+}$ ) and Tetrabutylammonium salt ( $1.0 \times 10^{-3}$  M) of anions ( $\text{F}^-$ ,  $\text{Cl}^-$ ,  $\text{Br}^-$ ,  $\text{I}^-$ ,  $\text{AcO}^-$ ,  $\text{H}_2\text{PO}_4^-$ ,  $\text{HSO}_4^-$  and  $\text{ClO}_4^-$ ) and sodium salt ( $1.0 \times 10^{-3}$  M) of anions ( $\text{CN}^-$ ) were used for the fluorescence experiments

For  $^1\text{H-NMR}$  titrations, the solution of **L2** was prepared in  $\text{DMSO-}d_6$  and the appropriate concentrated solution of guest was prepared in  $\text{DMSO-}d_6$ . Aliquots of the two solutions were mixed directly in NMR tubes.

## 2. Synthesis of sensor molecule L2

Compound **L2** can be readily prepared by a simple and low-cost amide reaction of naphtha [2, 1-*b*] furan-2-carbonyl chloride and 8-aminoquinoline (Scheme S1). naphtha [2, 1-*b*] furan-2-carbonyl chloride (0.462 g, 2 mmol), 8-aminoquinoline (0.360 g, 2.5 mmol) and 2.5ml triethylamine ( $\text{Et}_3\text{N}$ ) were combined in hot absolute tetrahydrofuran (30 mL). The solution was stirred under reflux for 6 hours. After cooling to room temperature, the yellow precipitate was filtered, washed three times with hot absolute tetrahydrofuran, then recrystallized with THF to give a yellow powder product **L2** (1.56 mmol) in 78% (m. p.  $>300\text{ }^\circ\text{C}$ ), IR: ( $\text{KBr, cm}^{-1}$ )  $\nu$ : 3338 ( $-\text{NH}-$ ), 3118 ( $\text{C}=\text{CH}$ ), 3046 ( $\text{ArH}$ ), 1681 ( $\text{C}=\text{O}$ ), 1596 ( $\text{C}=\text{C}$ ), 1564 ( $\text{C}=\text{N}$ ), 1531 ( $\text{C}=\text{C}$ ), 1487 ( $\text{C}-\text{N}$ ).  $^1\text{H-NMR}$  ( $\text{DMSO-}d_6$ , 600 MHz):  $\delta$  10.94 (1H, s, NH), 9.08 (1H, s,  $\text{C}=\text{CH}$ ), 8.94 (1H, d, ArH), 8.57–8.52 (3H, m, ArH), 8.14–8.04 (3H, m, ArH), 7.82–7.62(5H, m, ArH);  $^{13}\text{C-NMR}$  ( $\text{DMSO-}d_6$ , 150 MHz):  $\delta$  155.85, 152.48, 149.32, 147.84, 137.62, 137.76, 133.40, 130.11, 128.88, 128.77, 127.81, 127.31, 127.03, 125.53, 123.88, 122.55, 122.46, 116.35, 112.58, 111.10, 109.67, 109.22; Anal. calcd for  $\text{C}_{22}\text{H}_{14}\text{N}_2\text{O}_2$ : C, 78.11, H, 4.14, N, 8.28, O, 9.47; found C, 78.07; H, 4.11; N, 8.33; O, 9.49.

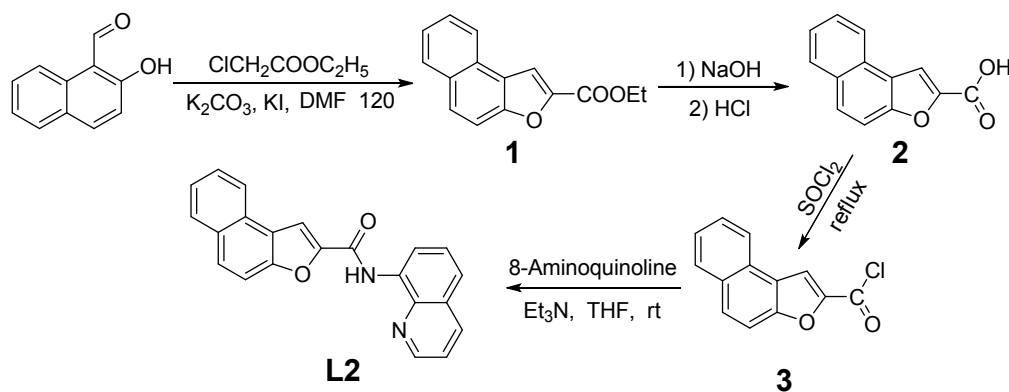

**Scheme S1** Synthesis of the sensor compound **L2**.

### 3. Absorbance spectra of L2 in DMSO in the presence of fluoride anions

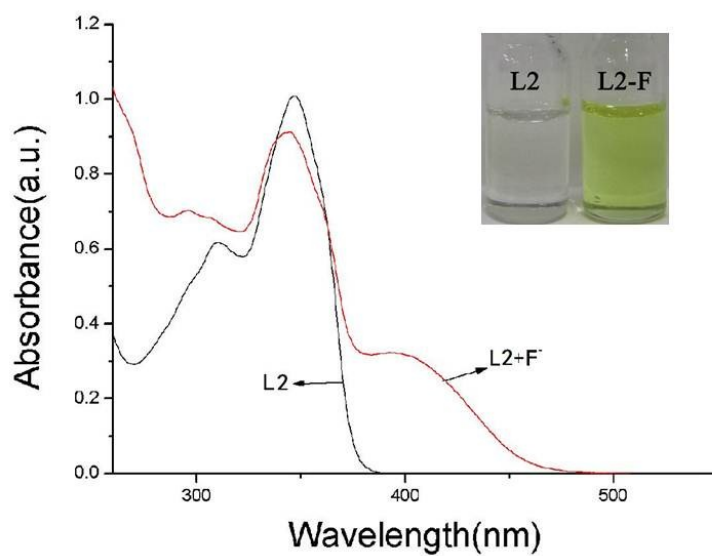

**Fig. S1:** Absorbance spectra of **L2** in DMSO in the presence of fluoride anions (20 equiv.). Inset: photograph showing the change in color of the solution of **L2** in DMSO after addition of fluoride anions (20 equiv.).

#### 4. Plot of fluorescence intensity depending on the concentration of zinc ions

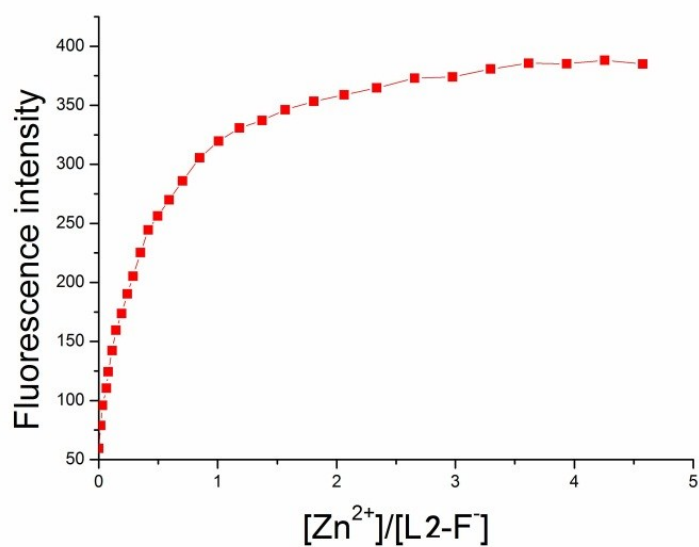

**Fig. S2:** A plot of fluorescence intensity depending on the concentration of zinc ions in the range from 0 to 5 equivalents in **L2-F**.

## 5. Determination of Detection Limit

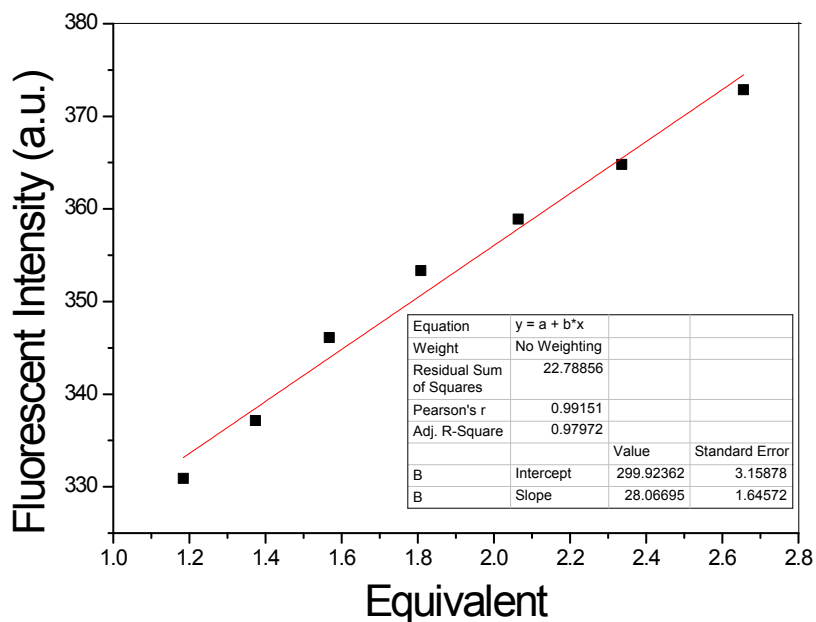

Linear Equation:  $Y = 28.0669 \times X + 299.9236$        $R = 0.979$

$$S = 2.8067 \times 10^7 \quad \delta = \sqrt{\frac{\sum(F - F)^2}{(N - 1)}} = 1.9647 (N = 15) \quad K$$

= 3

$$LOD = K \times \delta/S = 2.1 \times 10^{-7} \text{ M}$$

**Fig. S3:** The photograph of the fluorescent spectrum linear range.

## 6. The UV-vis spectroscopy and fluorescence spectroscopy for the stability and reproducibility of the sensor L2

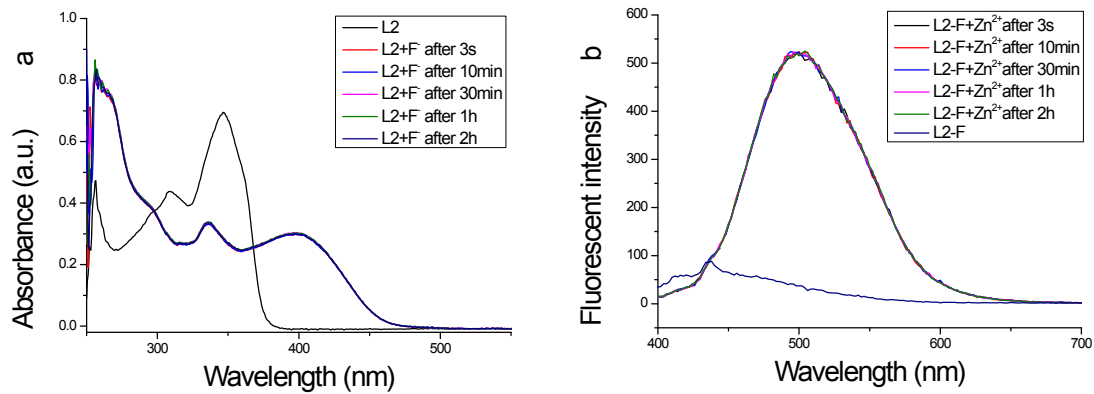

**Fig. S4:** The UV-vis spectroscopy and fluorescence spectroscopy for the stability and reproducibility of the sensor **L2**.



## 7. IR spectra of sensor L2 and after adding fluoride anions

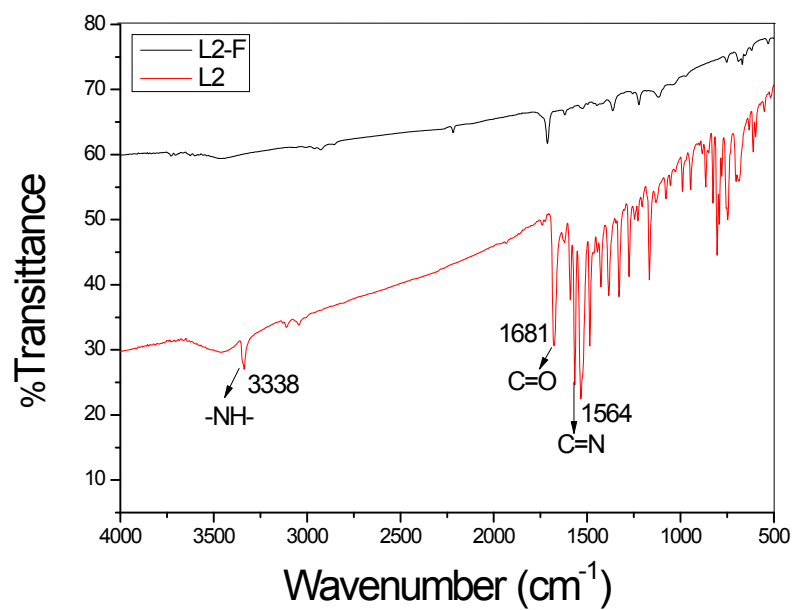

Fig. S5: IR spectra of sensor L2 and after adding fluoride anions in KBr disks.

## 8. IR spectra of L2-F and after adding zinc ions

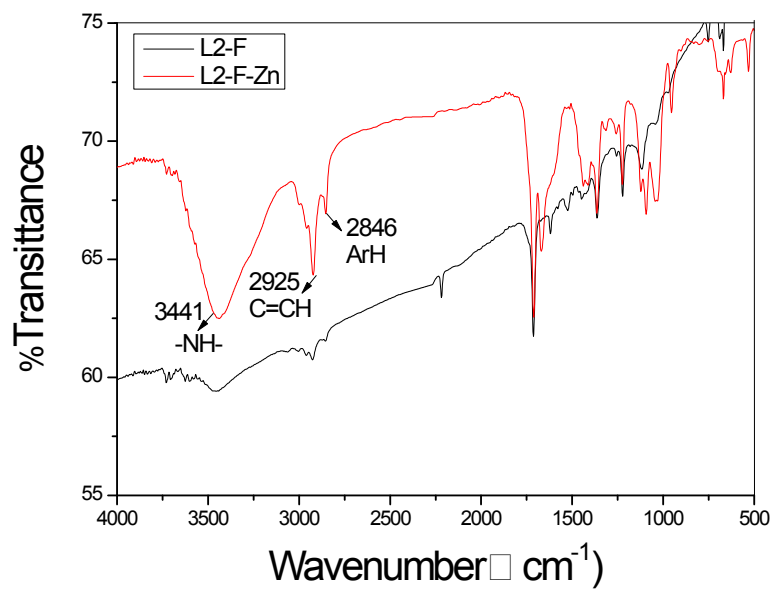

Fig. S6: IR spectra of L2-F and after adding zinc ions in KBr disks.

## 9. The Job's plot examined between zinc ions and L2-F

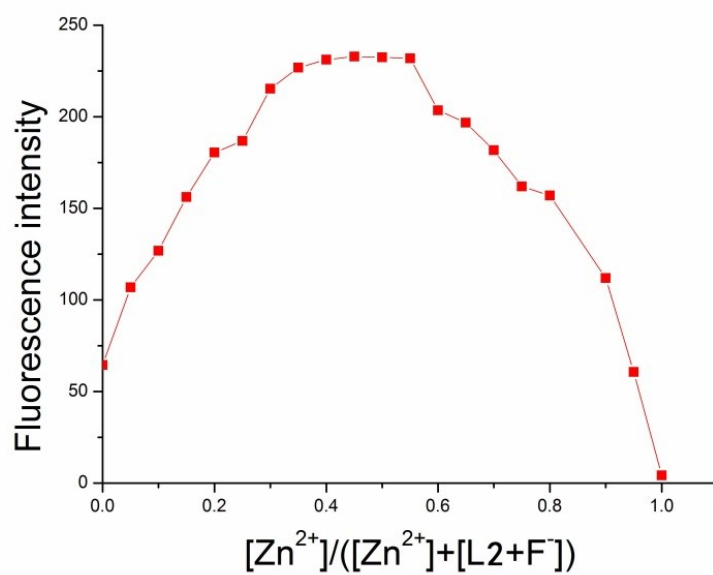

**Fig. S7:** The Job's plot examined between zinc ions and L2-F, indicating the 1:1 stoichiometry for L2-F and zinc ion.

## 10. ESI/MS of L2

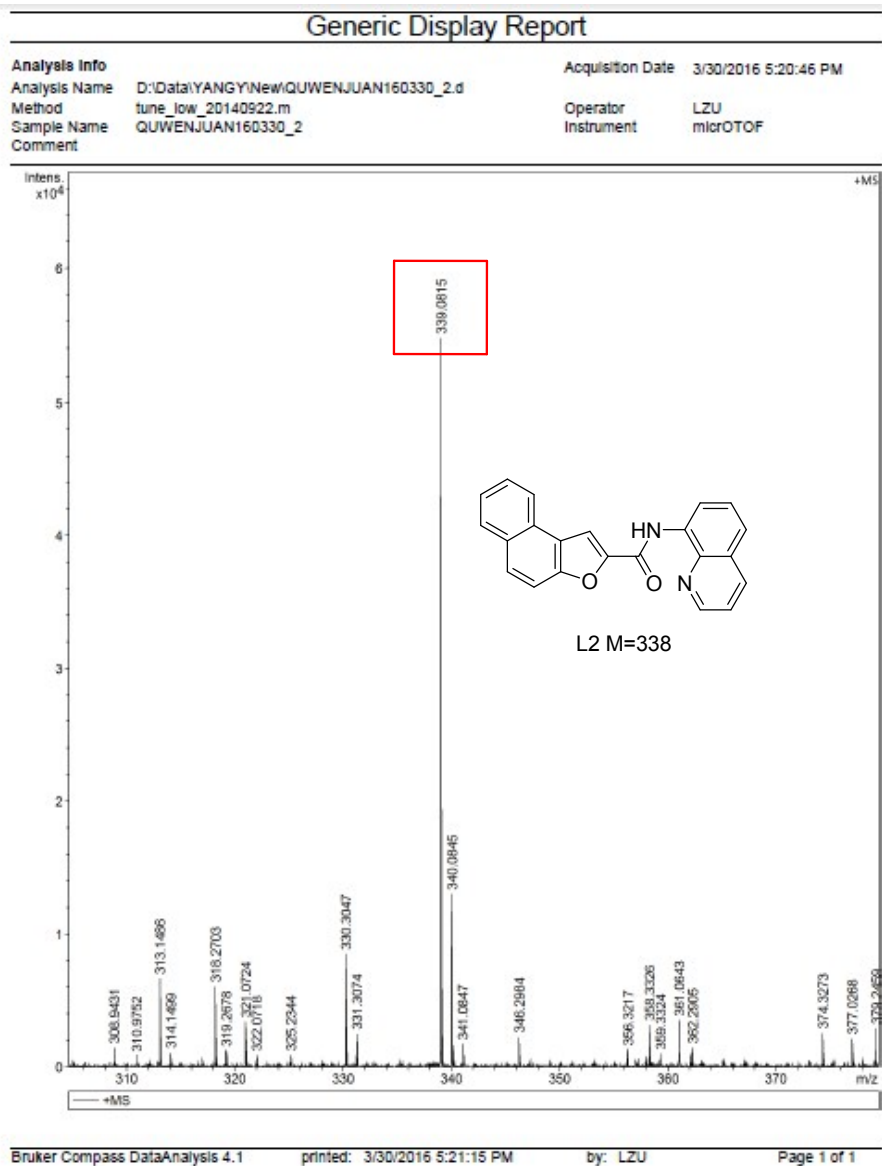

**Fig. S8:** The ESI/MS of L2 in DMSO.

## 11. ESI/MS of L2-F with zinc

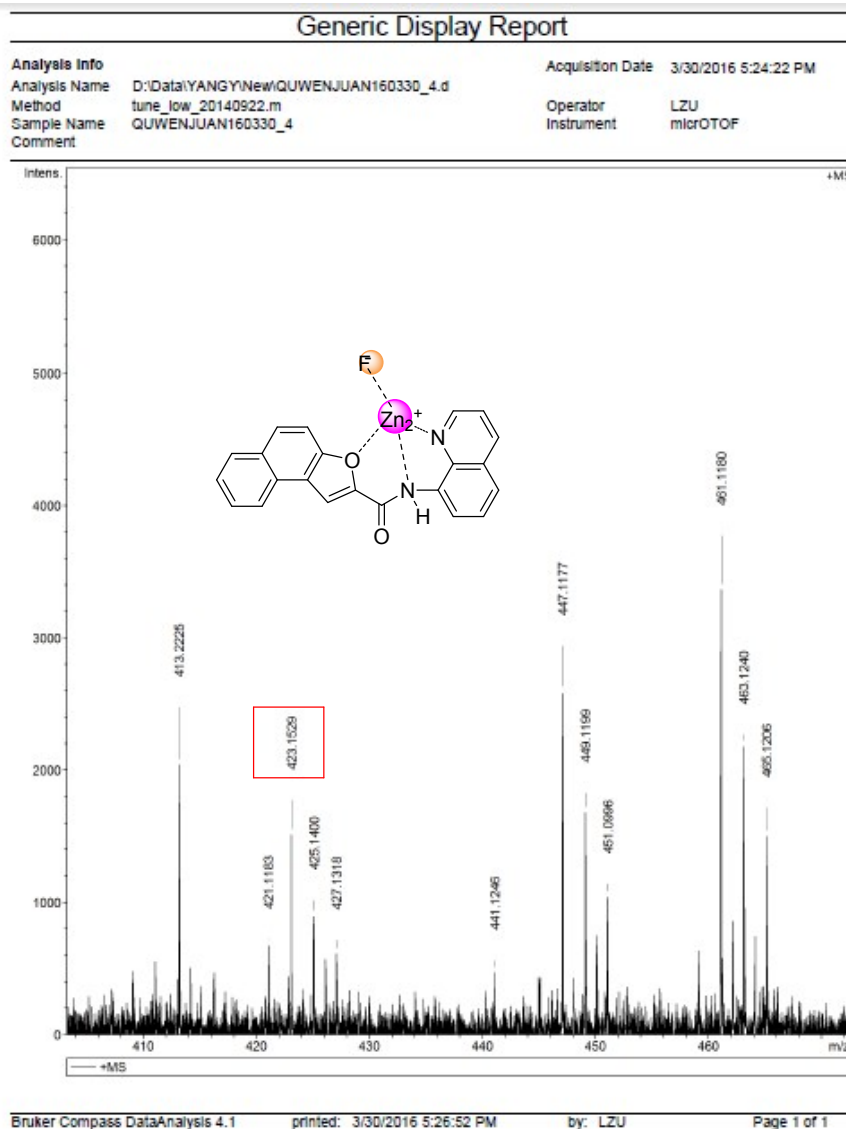

**Fig. S9:** The ESI/MS of L2-F with zinc in DMSO.

## 12. $^1\text{H}$ -NMR spectrum of L2

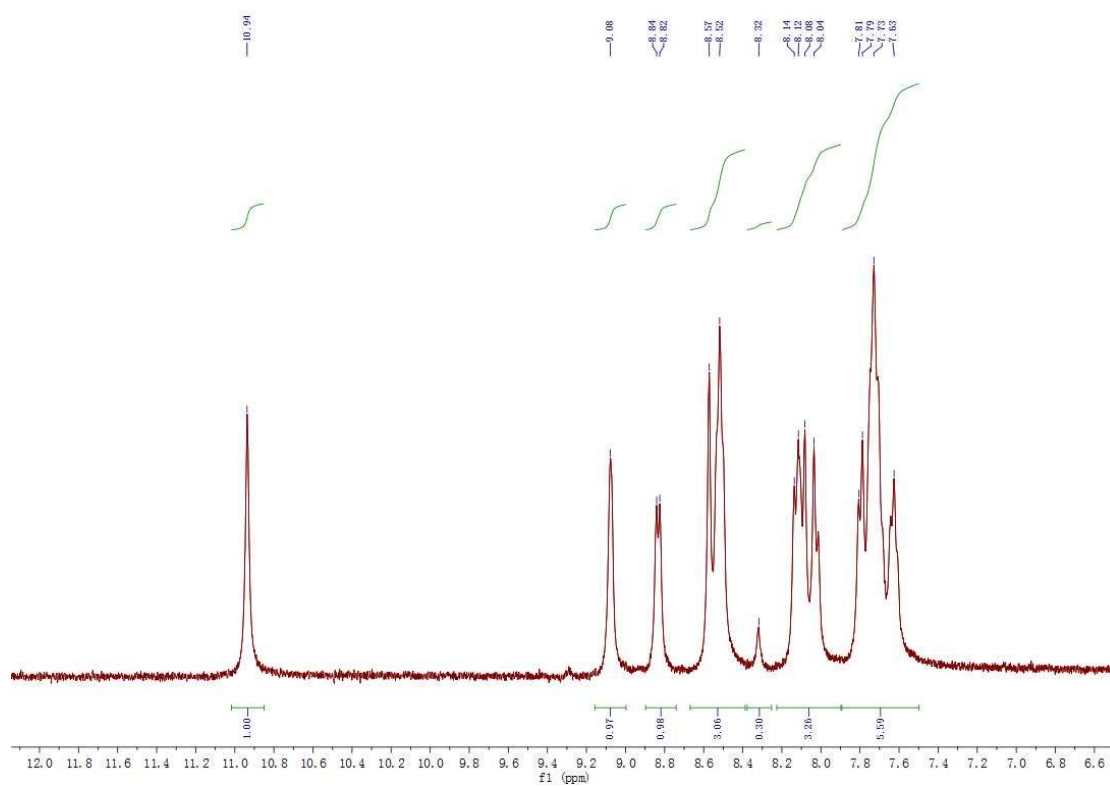

**Fig. S10:**  $^1\text{H}$ -NMR spectrum of L2 in  $\text{DMSO}-d_6$ .

### 13. $^{13}\text{C}$ -NMR spectrum of L2

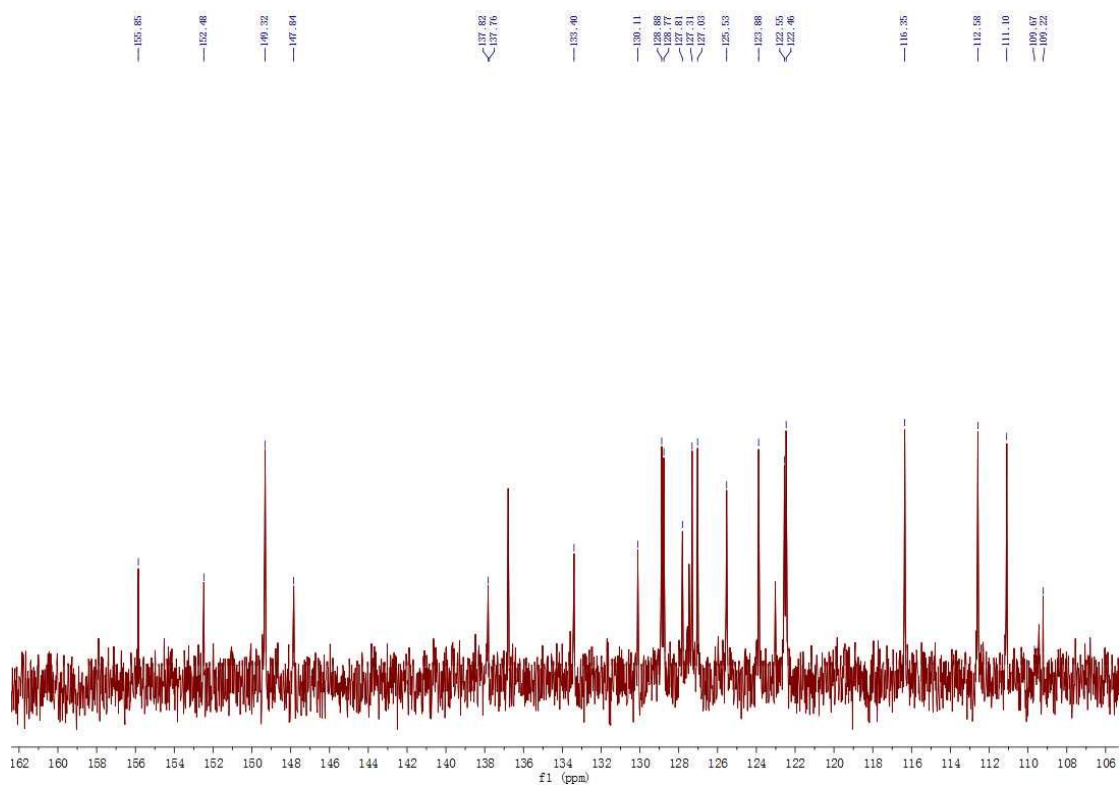

**Fig. S11:**  $^{13}\text{C}$ -NMR spectrum of L2 in  $\text{DMSO}-d_6$ .
